# Supplementary material for: A New Method for Re-Analyzing Evaluation Bias: Piecewise Growth Curve Modeling Reveals an Asymmetry in the Evaluation of Pro and Con Arguments
Source: PLOS journal article supplement (doi:10.1371/journal.pone.0148283), 2016-02-03
Supplement: S4 (10.1371/journal.pone.0148283.s004) [file journal.pone.0148283.s004]

**S4 Table. Group-specific attitudinal evaluation bias for each con-argument.**

| Group    | <i>n</i> | Argument          | Estimate | Bayesian<br>99% credibility interval<br>[lower 0.5%, upper 0.5%] | Significance |
|----------|----------|-------------------|----------|------------------------------------------------------------------|--------------|
| Study 1a | 69       | --- (strong con)  | -0.24    | [-0.62, 0.14]                                                    | ns           |
| Study 1b | 110      | --- (strong con)  | -0.25    | [-0.59, 0.11]                                                    | ns           |
| Study 2a | 60       | --- (strong con)  | -0.38    | [-0.86, 0.10]                                                    | ns†          |
| Study 2b | 110      | --- (strong con)  | -0.34    | [-0.64, -0.04]                                                   | *            |
| Study 1a | 69       | -- (moderate con) | -0.28    | [-0.55, -0.01]                                                   | *            |
| Study 1b | 110      | -- (moderate con) | -0.18    | [-0.43, 0.07]                                                    | ns           |
| Study 2a | 60       | -- (moderate con) | -0.24    | [-0.60, 0.11]                                                    | ns           |
| Study 2b | 110      | -- (moderate con) | -0.31    | [-0.53, -0.10]                                                   | *            |
| Study 1a | 69       | - (weak con)      | -0.36    | [-0.80, 0.06]                                                    | ns†          |
| Study 1b | 110      | - (weak con)      | -0.07    | [-0.41, 0.26]                                                    | ns           |
| Study 2a | 60       | - (weak con)      | 0.02     | [-0.46, 0.51]                                                    | ns           |
| Study 2b | 110      | - (weak con)      | -0.26    | [-0.58, 0.05]                                                    | ns†          |

\* Bayesian 99% credibility interval does not contain the value of zero (significant).

ns: Bayesian 99% credibility interval contains the value of zero (not significant).

† A 95% credibility interval would not contain the value of zero.
